# Supplementary material
Source: HighWire-hosted journal article supplement (http://gut.bmj.com/highwire/filestream/192727/field_highwire_adjunct_files/2/58101375webonlytable1B.xls)
Supplement: 58101375webonlytable1B.xls [file 58101375webonlytable1B.xls]

## Sheet: Sheet1
Supplementary table 1B
The full list of miRNAs (95 miRNAs and U6 snRNA) analyzed in tissue samples of CRC patients compared to their adjacent normal using real-time PCR based miRNA profiling arrays.
MicroRNA	MirBase #	Tissue samples from 5 CRC patients				Tumor expression level compared to normal (T/N)
		CRC tumors		Adjacent normal tissues
		Average Ct values	Normalized to U6	Average Ct values	Normalized to U6
miR-18a	MIMAT0000072	21.4145	1.35238	25.0569	0.321547	4.20586
miR-224	MIMAT0000280	21.2755	1.48916	24.7264	0.404329	3.68305
miR-223	MIMAT0000279	15.8905	62.2283	19.2859	17.5585	3.54405
miR-135b	MIMAT0000758	22.995	0.45219	26.2043	0.145158	3.11515
miR-95	MIMAT0000094	21.105	1.67597	24.1954	0.584227	2.86871
miR-106a	MIMAT0000103	18.61	9.44794	21.6703	3.36289	2.80947
miR-19a+b*	MIMAT0000073, MIMAT0000074	16.8105	32.8882	19.8386	11.9704	2.74746
miR-17-3p	MIMAT0000071	19.36	5.61778	22.3747	2.0638	2.72206
miR-20a	MIMAT0000462	17.2265	24.6497	20.1603	9.57784	2.57362
miR-92	MIMAT0000092	17.1505	25.9831	19.9702	10.9268	2.37792
miR-221	MIMAT0000278	18.9065	7.69275	21.6426	3.42808	2.24404
miR-106b	MIMAT0000680	20.2805	2.96802	23.0075	1.33099	2.22993
miR-222	MIMAT0000279	18.685	8.96933	21.3784	4.11702	2.1786
miR-7	MIMAT0000252	19.615	4.70763	22.7975	1.53954	3.05781
miR-17-5p	MIMAT0000070	23.3872	0.344554	25.3205	0.267851	1.28636
miR-203	MIMAT0002811	20.3112	2.90553	22.0533	2.5788	1.1267
miR-183	MIMAT0000261	23.8628	0.247792	25.2618	0.278974	0.888227
miR-15a	MIMAT0000068	20.7083	2.20641	22.0993	2.49787	0.883315
miR-141	MIMAT0000432	20.7954	2.07714	22.1825	2.3579	0.88093
miR-219	MIMAT0000275	25.6301	0.0727908	26.9617	0.0858701	0.847685
miR-142-3p	MIMAT0000434	20.0891	3.38909	21.2876	4.38446	0.772978
miR-93	MIMAT0000093	20.2214	3.09213	21.3461	4.21023	0.734432
miR-25	MIMAT0000081	19.3723	5.57009	20.3449	8.42747	0.660944
miR-101-1	MIMAT0000099	22.5702	0.607013	23.5298	0.926717	0.655015
miR-134	MIMAT0000447	25.2962	0.0917467	26.2376	0.141846	0.646804
miR-181b	MIMAT0000257	21.5451	1.23533	22.4826	1.91507	0.645058
miR-206	MIMAT0000266	25.25	0.0947323	26.1837	0.147246	0.643361
miR-373	MIMAT0000726	25.8238	0.0636454	26.7342	0.100537	0.633054
miR-202	MIMAT0000617	20.5222	2.5102	21.4318	3.96742	0.632703
miR-122a	MIMAT0000421	26.2751	0.0465492	27.169	0.074377	0.625855
miR-296	MIMAT0000690	25.105	0.104748	25.9989	0.167369	0.625855
miR-488	MIMAT0002804	27.4527	0.0205788	28.1387	0.0379778	0.541863
miR-181d	MIMAT0002821	24.6034	0.148301	25.2729	0.276835	0.535701
miR-185	MIMAT0000455	23.0966	0.42144	23.7545	0.793059	0.531411
miR-107	MIMAT0000104	20.75	2.14355	21.3974	4.06315	0.527557
miR-210	MIMAT0000076	21.3148	1.44914	21.9498	2.7706	0.523042
miR-15b	MIMAT0000417	19.4327	5.3417	20.0164	10.5824	0.504771
miR-188	MIMAT0000457	24.6106	0.147563	25.1618	0.298996	0.493527
miR-200a*	MIMAT0000073, MIMAT0000074	20.2828	2.96329	20.8164	6.07801	0.487543
miR-21	MIMAT0000075	15.1646	102.921	15.6905	212.232	0.484947
miR-196a	MIMAT0000461	21.5327	1.246	22.0555	2.57487	0.483906
miR-128b	MIMAT0000676	26.8647	0.0309332	27.3803	0.0642438	0.481497
miR-191	MIMAT0000458	18.6352	9.28434	19.1177	19.7297	0.470576
miR-126	MIMAT0000444	18.5864	9.60376	19.0611	20.5192	0.468039
miR-136	MIMAT0000448	27.1008	0.0262634	27.5584	0.0567829	0.462524
miR-155	MIMAT0000646	22.3129	0.725526	22.716	1.62902	0.445377
miR-186	MIMAT0000456	23.2024	0.39164	23.5969	0.884602	0.44273
miR-103	MIMAT0000101	20.0863	3.39568	20.4792	7.67837	0.44224
miR-198	MIMAT0000228	26.106	0.0523379	26.4718	0.120591	0.43401
miR-16	MIMAT0000069	16.9598	29.6549	17.2009	74.4965	0.398072
miR-146a	MIMAT0000449	22.0231	0.886935	22.2353	2.27316	0.390177
miR-151	MIMAT0000757	22.502	0.636397	22.6809	1.66913	0.381274
miR-132	MIMAT0000426	22.9608	0.463037	23.1376	1.21622	0.380719
miR-24	MIMAT0000080	18.7558	8.53979	18.9224	22.5898	0.378037
miR-195	MIMAT0000460	18.085	13.595	18.235	36.3781	0.373712
miR-181c	MIMAT0000258	20.8511	1.99848	21.0005	5.34986	0.373557
miR-27a+b*	MIMAT0000084, MIMAT0000419	19.2298	6.14835	19.361	16.6679	0.368874
miR-197	MIMAT0000226	22.8623	0.495755	22.9714	1.36472	0.363266
miR-140	MIMAT0000431	25.1848	0.0991118	25.2142	0.288331	0.343742
miR-26b	MIMAT0000083	21.3843	1.38099	21.3582	4.17507	0.33077
miR-214	MIMAT0000267	21.7849	1.04616	21.7476	3.18744	0.328212
miR-149	MIMAT0000450	24.139	0.204617	24.1013	0.623603	0.328121
miR-199a+b*	MIMAT0000231, MIMAT0000263	21.7445	1.07587	21.6859	3.32672	0.323402
miR-9-1	MIMAT0000441	25.0674	0.107514	24.9956	0.335504	0.320456
miR-181a	MIMAT0000256	21.4805	1.29191	21.3797	4.11331	0.314079
miR-205	MIMAT0000265	25.0956	0.105433	24.9454	0.347383	0.303507
miR-29a+b+c*	MIMAT0000086, MIMAT0000100, MIMAT0000681	18.8055	8.25061	18.6321	27.625	0.298665
let-7-family*	MIMAT0000062, MIMAT0000064, MIMAT0000065, MIMAT0000067	21.7503	1.07155	21.5627	3.62329	0.29574
miR-372	MIMAT0000724	22.6135	0.589066	22.3758	2.06222	0.285646
miR-200b	MIMAT0000682	17.24	24.4201	16.9867	86.4204	0.282574
miR-30b	MIMAT0000420	18.6396	9.25607	18.3184	34.3348	0.269583
miR-154	MIMAT0000452	25.0698	0.107336	24.692	0.414085	0.259211
miR-22	MIMAT0000276	21.6599	1.14084	21.2302	4.56242	0.250052
miR-200c	MIMAT0000318	16.7995	33.14	16.3156	137.606	0.240832
miR-194	MIMAT0000222	17.1714	25.6094	16.6389	109.98	0.232854
miR-30c	MIMAT0000244	19.2588	6.026	18.7049	26.2656	0.229426
miR-150	MIMAT0000451	20.7073	2.20794	19.9863	10.8055	0.204334
miR-10b	MIMAT0000254	19.1681	6.417	18.4219	31.9579	0.200796
miR-23a	MIMAT0000078	16.9788	29.2669	16.2306	145.957	0.200517
miR-192	MIMAT0000440	16.6286	37.3077	15.8618	188.471	0.197949
miR-30a-3p	MIMAT0000088	23.7204	0.273498	22.9376	1.39707	0.195766
miR-125a	MIMAT0000443	21.0544	1.7358	20.0363	10.4375	0.166305
miR-125b	MIMAT0000423	19.9892	3.63209	18.9381	22.3453	0.162544
miR-26a	MIMAT0000082	17.6743	18.0722	16.5809	114.492	0.157847
miR-215	MIMAT0000271	20.3985	2.73492	19.2143	18.4519	0.148219
miR-143	MIMAT0000435	20.5542	2.45513	19.3163	17.1924	0.142803
miR-218	MIMAT0000272	25.3732	0.0869783	24.0278	0.656197	0.132549
miR-204	MIMAT0000264	26.5322	0.0389509	24.9577	0.344434	0.113087
miR-133a	MIMAT0000427	23.9558	0.232322	22.0957	2.50411	0.0927763
miR-137	MIMAT0000429	29.5236	0.00489797	26.7289	0.100907	0.0485394
miR-145	MIMAT0000437	20.1648	3.21585	16.9507	88.604	0.0362946
miR-30a-5p	MIMAT0000087	19.4336	5.33837	14.2645	570.269	0.00936114
miR-1-1	MIMAT0000416	ND		ND
miR-153	MIMAT0000439	ND		ND
miR-190	MIMAT0000458	ND		ND
U6 snRNA		21.8527		23.4203
ND: Not detected
*Co-detection of miRNA family members in this miRNA profiling array
